# Supplementary material for: Abdominal Surgical Procedures in Adult Patients With Cystic Fibrosis: What Are the Risks?
Source: PubMed Central journal article supplement — Dis Colon Rectum. 2022 Jul 5;65(8):e805–15. doi: 10.1097/DCR.0000000000002162 (PMC9259049; doi:10.1097/dcr.0000000000002162), 2022-07-05
Supplement: dcr-65-e805-s002.pdf [file dcr-65-e805-s002.pdf]

**Supplemental Table 1: Procedure and diagnosis codes used to create study cohort**

| <b>Procedures and Diagnoses</b>             | <b>ICD-9 code(s)</b>                                                                                                      |
|---------------------------------------------|---------------------------------------------------------------------------------------------------------------------------|
| <b>Cystic fibrosis</b>                      | 277.0, 277.00, 277.01, 277.02, 277.03, 277.09                                                                             |
| <b>PROCEDURES</b>                           |                                                                                                                           |
| <b>Gastrostomy/enterostomy</b>              | 43.1, 43.11, 43.19, 44.32, 46.32, 46.3, 46.39                                                                             |
| <b>Cholecystectomy</b>                      | 51.21, 51.22, 51.2, 51.23, 51.24                                                                                          |
| <b>Small bowel resection</b>                | 45.6, 45.61, 45.62, 45.63                                                                                                 |
| <b>Partial colectomy</b>                    | 45.7, 45.71, 45.72, 45.73, 45.74, 45.75, 45.76, 45.79, 17.32, 17.33, 17.36, 17.35, 17.34, 17.3, 17.39, 17.31              |
| <b>Total colectomy</b>                      | 45.8, 45.81, 45.82, 45.83                                                                                                 |
| <b>Appendectomy</b>                         | 47.0, 47.1, 47.19, 47.01, 47.11                                                                                           |
| <b>Proctectomy</b>                          | 48.4, 48.40, 48.41, 48.42, 48.43, 48.49, 48.5, 48.50, 48.51, 48.52, 48.59, 48.6, 48.61, 48.62, 48.63, 48.64, 48.65, 48.69 |
| <b>Stoma creation</b>                       | 46.0, 46.01, 46.1, 46.10, 46.11, 46.13, 46.14, 46.2, 46.20, 46.21, 46.22, 46.23, 46.24                                    |
| <b>Stoma revision</b>                       | 46.4, 46.40, 46.41, 46.42, 46.43                                                                                          |
| <b>Stoma closure</b>                        | 46.5, 46.50, 46.51, 46.52                                                                                                 |
| <b>Lysis of adhesions</b>                   | 54.51, 54.5                                                                                                               |
| <b>DIAGNOSES</b>                            |                                                                                                                           |
| <b>Malnutrition</b>                         | 263.9, 263.0, 263.1, 263.8, 263, 262, 261                                                                                 |
| <b>Cholecystitis</b>                        | 574.1, 574.0, 574.4, 574.3, 575.10, 575.0, 575.11, 575.12, 575.1, 574.6, 574.7, 574.9, 574.8, 574.2, 574.5, 575.8         |
| <b>Bowel obstruction</b>                    | 560, 560.0, 560.2, 560.3, 560.30, 560.39, 560.8, 560.81, 560.9, 560.89                                                    |
| <b>Diverticulitis</b>                       | 562.11, 562.13                                                                                                            |
| <b>Bowel perforation/Sepsis/Peritonitis</b> | 569.83, 003.1, 036.2, 038.x, 054.5, 449, 785.52, 790.7, 995.91–995.92, 567.0–567.21, 567.29, 567.89, 567.9                |
| <b>Intestinal fistula</b>                   | 569.81, 596.1, 619.1                                                                                                      |
| <b>Colorectal cancer</b>                    | 153, 153.0, 153.1, 153.2, 153.3, 153.4, 153.5, 153.6, 153.7, 153.8, 153.9, 154, 154.0, 154.1, 154.8                       |

|                                            |                                                                                                                                                                                                                                                                                                                                                                         |
|--------------------------------------------|-------------------------------------------------------------------------------------------------------------------------------------------------------------------------------------------------------------------------------------------------------------------------------------------------------------------------------------------------------------------------|
| <b>Polyp</b>                               | 211.3, 211.4                                                                                                                                                                                                                                                                                                                                                            |
| <b>Appendicitis</b>                        | 540, 540.0, 540.1, 540.9                                                                                                                                                                                                                                                                                                                                                |
| <b>Complications (respiratory in bold)</b> | 997, <b>997.3, 997.31, 997.39</b> , 997.4, 997.5, 998.1, 998.11, 998.12, 998.2, 998.3, 998.30, 998.31, 998.32, 998.33, 998.83, 998.5, 998.51, 998.59, 998.6<br><br>995.91, 995.92, <b>487, 480.09, 481, 482, 481.09, 483.08, 485, 486, 507</b> , 453.4, 453.41, 453.42, <b>518.51, 518.52, 518.53, 518.81</b> , 567.22, 599, 584.59, 410, 958.93, 427.5, 434.91, 567.22 |
